# Supplementary material for: Marine-Derived Water-Soluble Organic Nitrogen in Coastal Air: Influence of Ocean Productivity on Atmospheric Nitrogen Cycling
Source: Copernicus journal article supplement (doi:10.5194/egusphere-2025-5891), 2025-12-16
Supplement: Supplementary file [file Thailand-Supplement-20260331.pdf › Thailand-Supplement-20260331.pdf]

1 *Supplement of*

2 **Marine-Derived Water-Soluble Organic Nitrogen in Coastal Air: Influence of**  
3 **Ocean Productivity on Atmospheric Nitrogen Cycling**

4 Jiao Tang<sup>1,2</sup>, Shujie Hu<sup>3\*</sup>; Xiao Wang<sup>4</sup>; Jiaqi Wang<sup>5</sup>, Shaojun Lv<sup>2</sup>; Xiaofei Geng<sup>2</sup>;  
5 Guangcai Zhong<sup>2</sup>, Yangzhi Mo<sup>2</sup>, Surat Bualert<sup>6</sup>, Jun Li<sup>2</sup>, Shizhen Zhao<sup>2\*</sup>; Gan Zhang<sup>2</sup>

6

7 <sup>1</sup> College of Marine Sciences, South China Agricultural University, Guangzhou 510642,  
8 China

9 <sup>2</sup> State Key Laboratory of Advanced Environmental Technology, Guangzhou Institute  
10 of Geochemistry, Chinese Academy of Sciences, Guangzhou, 510640, China

11 <sup>3</sup> Chongqing Institute of Green and Intelligent Technology, Chinese Academy of  
12 Sciences, Chongqing, 400714, China

13 <sup>4</sup> School of Resources and Environment, Henan Polytechnic University, Jiaozuo  
14 454003, China

15 <sup>5</sup> School of Electrical and Information Engineering, Zhengzhou University, Zhengzhou,  
16 450001, China

17 <sup>6</sup> Faculty of Environment, Kasetsart University, Bangkok, 10900, Thailand

18

19 **Contents of this file**

20 Number of Text: 3

21 Number of Tables: 5

22 Number of Figures: 10

23

24

## 25 **Text S1. PMF model**

### 26 Data Input

27 The data input includes concentrations and uncertainties of various types of chemicals  
28 in 84 TSP samples. The types of chemicals include WSON, OC, EC, metal elements  
29 (Ni, V, Pb, Cu, Zn, Mn, Fe), water-soluble ions ( $K^+$ ,  $Na^+$ ,  $Mg^{2+}$ ,  $Ca^{2+}$ ,  $NH_4^+$ ,  $Cl^-$ ,  $SO_4^{2-}$ ,  
30  $NO_3^-$ ), biomass burning tracers (levoglucosan, mannosan, galactosan), steranes,  
31 hopanes, and SOA tracers (2-MGA, 2MGL, MBTCA, o/p-phthalic acid). The uncertainty  
32 file provides species-specific parameters that EPA PMF 5.0 uses to calculate  
33 uncertainties for each sample. If the concentration is less than or equal to the method  
34 detection limit (MDL), the uncertainty (Unc) is calculated using a fixed fraction of the  
35 MDL (1), and the concentration is replaced with half of the MDL.

$$36 \text{ Unc} = \frac{5}{6} \times \text{MDL} \quad (1)$$

37 If the concentration is higher than the MDL, the calculation is based on a user- provided  
38 fraction of the concentration and MDL (Equation 2). Al element was set as bad,  
39 resulting in solutions that didn't converge. Weak signals were found for species of  
40 galactosan, mannosan, levoglucosan, hopanes and steranes, 2-MGA, and o-Phthalic  
41 acid, which had a low signal-to-noise ratio ( $S/N < 3$ ). Other species with an S/N greater  
42 than 3 were set as strong.

$$43 \text{ Unc} = \sqrt{(\text{Error Fraction} \times \text{concentrations})^2 + (0.5 \times \text{MDL})^2} \quad (2)$$

### 44 Model run

45 The PMF model was executed using three to seven factors, 100 runs, and a random  
46 starting point, resulting in converged solutions. Despite yielding the lowest  $Q_{\text{robust}}/Q_{\text{true}}$   
47 ratio (1.043, approaching unity), the six-factor solution exhibited mixing of the  $NH_4^+$   
48 and  $SO_4^{2-}$  with biomass burning tracers. This chemically implausible separation  
49 rendered the six-factor interpretation problematic. Consequently, the seven-factor  
50 solution was selected for source profile analysis as it provided physically meaningful  
51 resolution.

52 *For WSON was set as the total variable:*

53 Uncertainty Estimation: To understand the uncertainty of the seven-factor solution, we  
54 did a complementary analysis of displacement (DISP), BS, and bootstrapping with  
55 displacement (BS-DISP). We used DISP intervals to include the effects of rotational  
56 ambiguity, but not the effects of random errors in the data. BS intervals included the  
57 effects of random errors and partially included the effects of rotational ambiguity. Finally,  
58 BS-DISP intervals included the effects of both random errors and rotational ambiguity.  
59 Tables S4–S5 show that the seven-factor solutions for WSON do not have significant

rotational ambiguity, and the base model and error estimates can be interpreted. With the absence of any swaps,  $dQ_{\max}$  provides confidence that these solutions are well constrained.

As shown in Figure S8, factor 1 was linked to high contribution of V, suggesting that it came from a shipping emission source (Celo *et al.*, 2015; Viana *et al.*, 2009). Factor 2 was characterized by high levels of  $\text{NH}_4^+$  and  $\text{SO}_4^{2-}$ , which was a secondary sulfate source. Factor 3 (dust) shows a high contribution of Mn (69 %), Fe,  $\text{Mg}^{2+}$ , and  $\text{Ca}^{2+}$ . Factor 4 was identified as SOA source because it was associated with high loadings of 2-MGA, 2-MGL, MBTCA, and p-phthalic acid. Factor 5 was linked to biomass burning, with high loadings of galactosan, mannosan, and levoglucosan,  $\text{NH}_4^+$ ,  $\text{NO}_3^-$ , and p-phthalic acid also had high loading for this source, as reported in the source profiles of biomass burning (Li *et al.*, 2007). Factor 6 showed high loadings with Pb, Cu, and Zn and was identified as vehicle emissions and fossil fuel combustion. Factor 7 was associated with high levels of  $\text{Na}^+$ ,  $\text{Cl}^-$ , and  $\text{Mg}^{2+}$ , which was identified as sea spray aerosols via the bubble-busting processes (Facchini *et al.*, 2008).

## **Text S2. Potential Source Contribution Function (PSCF) Model**

The PSCF model facilitates the identification of source region by partitioning the potential source domain into a grid matrix of  $i \times j$ , as detailed in our previous study (Geng *et al.*, 2020; Tang *et al.*, 2024). The PSCF analysis typically generates  $\text{PSCF}_{ij}$  values ranging from 0 to 1, with elevated  $\text{PSCF}_{ij}$  suggesting an increased likelihood that the  $ij_{\text{th}}$  cell being the source region. A notable constrain of PSCF-based methodologies is the necessity to establish a weighing function to designed to diminish the influences of cells with minimal residence time, a phenomenon often manifested as “trailing effects” (Petit *et al.*, 2017). To investigate the partitioning of aerosol sources and to ascertain the contributions of various aerosol emission sources and transportation mechanisms, we conducted a weighted Potential Source Contribution Function (WPSCF) analysis. Given that PSCF represents a conditional probability, the associated error escalates with increased distance between the grid and the sample points (Tiwari *et al.*, 2018). In this investigation, the experimental area was divided into a  $0.25^\circ \times 0.25^\circ$  grid. The threshold for the computation of  $m_{ij}$  was established at the 75th percentile. To mitigate the impact of small  $n_{ij}$  values on PSCF, a weighting function was applied (Tiwari *et al.*, 2018):

$$w_{ij} = \begin{cases} 1.00 & n_{ij} > 80 \\ 0.70 & 20 < n_{ij} \leq 80 \\ 0.42 & 10 < n_{ij} \leq 20 \\ 0.05 & n_{ij} \leq 10 \end{cases} \quad (3)$$

## **Text S3 Predicting ALWC Using a Thermodynamic Model.**

To predict the mass concentration of aerosol liquid water content (ALWC), we used a

thermodynamic model, ISORROPIA-II, <http://nenes.eas.gatech.edu/ISORROPIA/>, which calculates the ALW concentration with particle-phase concentrations of  $\text{Na}^+$ ,  $\text{SO}_2^-$ ,  $\text{NH}_4^+$ ,  $\text{NO}_3^-$ ,  $\text{Cl}^-$ ,  $\text{Ca}^{2+}$ ,  $\text{K}^+$ , and  $\text{Mg}^{2+}$ , as well as meteorological conditions (RH and ambient temperature) as the input (Fountoukis and Nenes, 2007), which was described in our previous studies (Xu *et al.*, 2022). Briefly, the contributions of particle water associated with organic fractions to ALW were estimated by calculating the organic hygroscopicity parameter. ALW was calculated as the sum of water associated with individual aerosol chemical components (i.e., the sum of ions and lumped organics) based on the Zdanovskii–Stokes–Robinson (ZSR) relationship.

**Table S1.** The concentrations of TSP, OC, EC, WSON,  $\text{NH}_4^+\text{-N}$ ,  $\text{NO}_3^-\text{-N}$ , and the ratio of OC/EC, WSON/WSON. In addition, the meteorological data, including relative humidity (RH), wind speed (WS), and temperature (Temp.) were also presented. Precipitation and radiation data are obtained based on historical reanalysis datasets from European Centre for Medium-Range Weather Forecasts (ECMWF). Cluster indicates the air masses that analyzed by HYSPLIT in Figures 1b and S1–S2.

| Date      | TSP<br>( $\mu\text{g m}^{-3}$ ) | OC<br>( $\mu\text{g m}^{-3}$ ) | EC<br>( $\mu\text{g m}^{-3}$ ) | OC/EC | WSON<br>( $\mu\text{gN m}^{-3}$ ) | $\text{NH}_4^+\text{-N}$<br>( $\mu\text{gN m}^{-3}$ ) | $\text{NO}_3^-\text{-N}$<br>( $\mu\text{gN m}^{-3}$ ) | RH<br>(%) | WS<br>(mph) | Temp.<br>(°C) | Precipitation<br>(mm) | Radiation<br>( $\text{W m}^{-2}$ ) | Cluster |
|-----------|---------------------------------|--------------------------------|--------------------------------|-------|-----------------------------------|-------------------------------------------------------|-------------------------------------------------------|-----------|-------------|---------------|-----------------------|------------------------------------|---------|
| 2016/1/18 | 42                              | 10                             | 1.7                            | 6.1   | 0.31                              | 0.11                                                  | 0.55                                                  | 80        | 5.6         | 29            | 0.453                 | 2845.62                            | 1       |
| 2016/1/25 | 66                              | 19                             | 1.4                            | 13    | 0.73                              | 0.32                                                  | 0.73                                                  | 65        | 11          | 17            | 0.049                 | 456.26                             | 3       |
| 2016/2/1  | 97                              | 18                             | 2.4                            | 7.7   | 1.2                               | 0.34                                                  | 1.6                                                   | 75        | 4.3         | 30            | 0.264                 | 4340.11                            | 1       |
| 2016/2/8  | 161                             | 38                             | 2.8                            | 14    | 1.1                               | 2.2                                                   | 2.7                                                   | 43        | 7.8         | 21            | 0.000                 | 8144.62                            | 5       |
| 2016/2/15 | 88                              | 15                             | 1.9                            | 8.0   | 1.3                               | 0.28                                                  | 1.1                                                   | 76        | 5.8         | 30            | 0.115                 | 3605.48                            | 1       |
| 2016/2/22 | 60                              | 11                             | 1.8                            | 5.9   | 0.89                              | 0.58                                                  | 1.3                                                   | 74        | 6.7         | 29            | 0.017                 | 3355.82                            | 2       |
| 2016/2/29 | 118                             | 23                             | 1.9                            | 12    | 1.3                               | 1.1                                                   | 0.69                                                  | 48        | 5.0         | 29            | 0.000                 | 4671.43                            | 3       |
| 2016/3/4  | 101                             | 13                             | 1.6                            | 8.1   | 1.3                               | 0.40                                                  | 0.75                                                  | 71        | 6.8         | 30            | 0.004                 | 4642.70                            | 1       |
| 2016/3/8  | 47                              | 8.7                            | 1.3                            | 6.7   | 0.35                              | 0.51                                                  | 0.98                                                  | 74        | 9.2         | 30            | 0.094                 | 4934.61                            | 2       |
| 2016/3/10 | 37                              | 9.7                            | 1.6                            | 6.0   | 0.50                              | 0.34                                                  | 0.58                                                  | 78        | 7.5         | 30            | 0.000                 | 4929.85                            | 2       |
| 2016/3/14 | 33                              | 8.0                            | 1.3                            | 6.2   | 0.49                              | 0.10                                                  | 0.45                                                  | 73        | 7.8         | 31            | 0.000                 | 5116.68                            | 2       |
| 2016/3/16 | 40                              | 9.9                            | 1.4                            | 7.3   | 0.41                              | 0.22                                                  | 0.56                                                  | 69        | 9.7         | 31            | 0.005                 | 5223.13                            | 2       |
| 2016/3/18 | 59                              | 10                             | 1.4                            | 7.5   | 0.71                              | 0.52                                                  | 0.50                                                  | 74        | 9.4         | 31            | 0.001                 | 5809.82                            | 2       |
| 2016/3/20 | 51                              | 8.0                            | 1.0                            | 7.9   | 0.60                              | 0.48                                                  | 0.44                                                  | 74        | 11          | 31            | 0.000                 | 5953.51                            | 2       |
| 2016/3/22 | 80                              | 13                             | 1.6                            | 8.1   | 0.91                              | 0.75                                                  | 0.34                                                  | 74        | 9.0         | 31            | 0.000                 | 7301.90                            | 2       |
| 2016/3/24 | 111                             | 15                             | 1.7                            | 8.9   | 0.65                              | 1.26                                                  | 0.55                                                  | 64        | 7.3         | 32            | 0.000                 | 6984.91                            | 1       |
| 2016/3/26 | 54                              | 11                             | 1.2                            | 9.3   | 0.80                              | 0.71                                                  | 0.78                                                  | 59        | 8.3         | 30            | 0.184                 | 3269.41                            | 3       |

|           |     |     |      |     |      |      |      |    |     |    |       |         |   |
|-----------|-----|-----|------|-----|------|------|------|----|-----|----|-------|---------|---|
| 2016/3/28 | 111 | 24  | 2.1  | 12  | 1.2  | 2.10 | 2.7  | 68 | 7.1 | 29 | 0.016 | 2870.25 | 4 |
| 2016/3/30 | 57  | 11  | 1.4  | 7.6 | 0.84 | 0.54 | 0.94 | 77 | 6.2 | 30 | 1.276 | 3838.34 | 2 |
| 2016/4/1  | 43  | 8.3 | 1.3  | 6.2 | 0.54 | 0.39 | 0.82 | 71 | 8.7 | 31 | 0.278 | 4539.01 | 2 |
| 2016/4/3  | 18  | 6.1 | 0.83 | 7.3 | 0.57 | 0.35 | 0.39 | 68 | 8.7 | 31 | 0.012 | 4226.13 | 2 |
| 2016/4/5  | 28  | 6.9 | 1.1  | 6.2 | 0.64 | 0.13 | 0.39 | 69 | 8.8 | 32 | 0.168 | 5370.84 | 2 |
| 2016/4/7  | 35  | 8.7 | 1.2  | 7.2 | 0.57 | 0.31 | 0.32 | 72 | 10  | 32 | 0.064 | 3968.69 | 2 |
| 2016/4/9  | 25  | 5.4 | 0.95 | 5.7 | 0.53 | 0.09 | 0.24 | 67 | 10  | 32 | 0.012 | 5640.03 | 2 |
| 2016/4/13 | 63  | 8.7 | 1.3  | 6.6 | 0.59 | 1.8  | 0.28 | 55 | 9.8 | 33 | 0.000 | 6572.45 | 1 |
| 2016/4/15 | 37  | 7.1 | 0.95 | 7.5 | 0.41 | 1.1  | 0.12 | 65 | 9.8 | 33 | 0.224 | 5262.17 | 2 |
| 2016/4/17 | 32  | 7.9 | 0.16 | 49  | 0.27 | 1.1  | 0.10 | 71 | 9.7 | 33 | 0.544 | 5817.36 | 2 |
| 2016/4/19 | 26  | 6.2 | 1.1  | 5.9 | 0.41 | 0.57 | 0.12 | 68 | 9.7 | 32 | 0.448 | 5535.08 | 2 |
| 2016/4/21 | 34  | 6.6 | 0.91 | 7.2 | 0.57 | 0.07 | 0.41 | 63 | 9.9 | 32 | 0.372 | 4912.19 | 2 |
| 2016/4/23 | 38  | 8.4 | 0.99 | 8.5 | 0.92 | 0.08 | 0.35 | 65 | 10  | 33 | 0.311 | 5393.97 | 2 |
| 2016/4/25 | 40  | 9.8 | 1.1  | 8.6 | 0.98 | 0.35 | 0.26 | 69 | 9.7 | 33 | 0.218 | 5708.40 | 2 |
| 2016/4/27 | 47  | 11  | 1.2  | 8.5 | 1.2  | 0.53 | 0.44 | 69 | 9.7 | 33 | 0.438 | 4995.66 | 2 |
| 2016/4/29 | 29  | 7.1 | 1.0  | 7.1 | 0.84 | 0.36 | 0.16 | 72 | 9.1 | 33 | 0.152 | 4496.61 | 2 |
| 2016/5/1  | 20  | 5.4 | 0.96 | 5.6 | 0.84 | 0.23 | 0.20 | 74 | 6.4 | 30 | 0.580 | 4786.53 | 1 |
| 2016/5/3  | 23  | 5.7 | 1.3  | 4.3 | 0.77 | 0.31 | 0.18 | 63 | 8.5 | 33 | 0.443 | 5948.07 | 2 |
| 2016/5/5  | 21  | 5.4 | 0.91 | 5.9 | 0.88 | 0.09 | BDL  | 66 | 7.9 | 33 | 0.003 | 5921.03 | 2 |
| 2016/5/9  | 20  | 3.7 | 0.63 | 5.9 | 0.66 | 0.06 | 0.20 | 61 | 10  | 34 | 0.058 | 4461.39 | 2 |
| 2016/5/11 | 36  | 8.7 | 1.0  | 8.5 | 1.1  | 0.19 | 0.34 | 66 | 9.5 | 34 | 0.647 | 5327.31 | 2 |
| 2016/5/15 | 44  | 11  | 1.1  | 9.5 | 1.1  | 0.50 | 0.53 | 73 | 7.7 | 31 | 2.188 | 3869.72 | 1 |
| 2016/5/17 | 41  | 9.9 | 1.1  | 8.8 | 1.2  | 0.67 | 0.64 | 76 | 6.8 | 30 | 2.089 | 2627.67 | 1 |
| 2016/5/19 | 36  | 7.7 | 1.1  | 7.0 | 0.93 | 0.17 | 0.29 | 66 | 7.9 | 32 | 0.792 | 3161.86 | 1 |
| 2016/5/21 | 25  | 5.8 | 0.94 | 6.2 | 0.92 | 0.02 | 0    | 65 | 9.3 | 32 | 1.402 | 2336.95 | 6 |

|            |    |     |      |     |      |      |      |    |     |    |        |         |   |
|------------|----|-----|------|-----|------|------|------|----|-----|----|--------|---------|---|
| 2016/5/23  | 39 | 7.1 | 0.93 | 7.6 | 0.98 | 0.39 | 0    | 63 | 10  | 31 | 12.116 | 2166.24 | 6 |
| 2016/5/25  | 39 | 8.1 | 1.4  | 5.7 | 0.69 | 0.11 | 0.31 | 58 | 11  | 32 | 1.066  | 1400.26 | 6 |
| 2016/5/27  | 39 | 6.6 | 1.0  | 6.6 | 0.78 | 0.16 | 0.39 | 62 | 8.3 | 32 | 1.198  | 2902.14 | 6 |
| 2016/5/29  | 46 | 6.0 | 0.88 | 6.8 | 0.89 | 0.23 | 0.52 | 61 | 8.8 | 32 | 2.901  | 902.48  | 1 |
| 2016/5/31  | 42 | 7.9 | 1.2  | 6.8 | 0.84 | 0.05 | 0.41 | 82 | 7.5 | 29 | 2.012  | 1927.43 | 1 |
| 2016/6/2   | 41 | 7.3 | 1.3  | 5.7 | 0.92 | 0.05 | 0.40 | 80 | 6.3 | 30 | 1.046  | 2302.63 | 2 |
| 2016/6/14  | 37 | 7.9 | 1.3  | 5.9 | 0.68 | 0.00 | 0.26 | 68 | 8.1 | 31 | 0.363  | 2907.11 | 6 |
| 2016/10/22 | 18 | 5.4 | 1.2  | 4.6 | 0.49 | 0.26 | 0.07 | 73 | 8.9 | 30 | 3.326  | 2077.57 | 6 |
| 2016/10/24 | 26 | 6.2 | 1.1  | 5.7 | 0.72 | 0.70 | 0.25 | 73 | 6.7 | 29 | 1.569  | 3366.86 | 1 |
| 2016/10/26 | 17 | 5.8 | 1.2  | 4.9 | 0.61 | 0.12 | 0.09 | 89 | 5.4 | 28 | 6.510  | 2059.29 | 4 |
| 2016/10/28 | 30 | 7.4 | 1.5  | 5.1 | 0.71 | 0.19 | 0.25 | 84 | 5.9 | 29 | 1.616  | 3684.34 | 4 |
| 2016/10/30 | 18 | 5.8 | 1.0  | 5.6 | 0.47 | 0.09 | 0.08 | 89 | 5.0 | 27 | 5.517  | 2707.15 | 5 |
| 2016/11/1  | 26 | 8.9 | 1.3  | 7.1 | 0.73 | 0.12 | BDL  | 82 | 6.1 | 29 | 0.203  | 2615.73 | 3 |
| 2016/11/3  | 40 | 10  | 1.6  | 6.5 | 0.92 | 0.35 | 0.39 | 75 | 5.2 | 28 | 1.372  | 3752.32 | 3 |
| 2016/11/5  | 75 | 17  | 1.9  | 9.1 | 1.3  | 1.1  | 1.4  | 70 | 4.3 | 29 | 0.001  | 3672.66 | 4 |
| 2016/11/7  | 60 | 12  | 2.3  | 5.4 | 1.2  | 1.2  | 1.4  | 80 | 3.2 | 29 | 9.042  | 787.82  | 4 |
| 2016/11/9  | 43 | 10  | 1.7  | 6.1 | 1.2  | 0.62 | 0.98 | 89 | 5.3 | 28 | 6.884  | 317.76  | 4 |
| 2016/11/13 | 49 | 14  | 1.7  | 8.6 | 1.2  | 0.19 | 0.57 | 75 | 6.3 | 29 | 3.125  | 4701.36 | 5 |
| 2016/11/15 | 44 | 12  | 1.3  | 9.1 | 1.5  | BDL  | BDL  | 72 | 5.8 | 30 | 0.028  | 4410.31 | 5 |
| 2016/11/17 | 62 | 12  | 1.3  | 9.4 | 0.99 | 0.12 | 0.45 | 67 | 7.4 | 29 | 0.000  | 7075.15 | 5 |
| 2016/11/19 | 46 | 11  | 1.1  | 9.6 | 1.2  | 0.42 | 0.61 | 74 | 6.3 | 29 | 1.836  | 2255.39 | 4 |
| 2016/11/21 | 93 | 24  | 1.6  | 15  | 1.5  | 0.46 | 0.90 | 73 | 5.8 | 30 | 0.581  | 3279.00 | 4 |
| 2016/11/23 | 57 | 13  | 1.2  | 11  | 1.1  | 0.25 | 0.48 | 75 | 6.4 | 29 | 10.938 | 1452.02 | 4 |
| 2016/11/25 | 64 | 15  | 2.3  | 6.5 | 0.95 | 0.25 | 0.57 | 83 | 4.9 | 29 | 0.156  | 3046.12 | 5 |
| 2016/11/27 | 41 | 9.3 | 0.96 | 9.6 | 0.75 | 0.15 | 0.23 | 69 | 5.6 | 29 | 0.130  | 1766.73 | 5 |

|            |     |     |      |     |      |      |      |    |     |    |       |         |   |
|------------|-----|-----|------|-----|------|------|------|----|-----|----|-------|---------|---|
| 2016/11/29 | 78  | 15  | 1.5  | 10  | 0.92 | 0.44 | 0.82 | 71 | 4.6 | 27 | 0.000 | 5736.78 | 5 |
| 2016/12/1  | 66  | 12  | 1.4  | 8.5 | 0.97 | 0.49 | 0.48 | 68 | 6.0 | 27 | 0.002 | 5181.22 | 5 |
| 2016/12/3  | 64  | 12  | 1.3  | 9.2 | 0.88 | 0.45 | 0.56 | 67 | 8.2 | 28 | 0.012 | 2908.52 | 5 |
| 2016/12/5  | 51  | 14  | 1.3  | 11  | 1.3  | 0.41 | 0.33 | 72 | 5.1 | 28 | 0.614 | 2746.71 | 5 |
| 2017/12/7  | 73  | 14  | 1.5  | 9.4 | 1.7  | 0.67 | 0.56 | 65 | 6.5 | 27 | 0.931 | 2198.62 | 5 |
| 2016/12/9  | 103 | 21  | 2.1  | 10  | 1.4  | 0.91 | 1.1  | 65 | 4.2 | 27 | 0.000 | 5908.49 | 5 |
| 2016/12/11 | 106 | 24  | 1.8  | 13  | 1.7  | 1.7  | 1.2  | 62 | 6.2 | 27 | 0.021 | 3175.09 | 4 |
| 2016/12/13 | 98  | 25  | 1.9  | 13  | 1.3  | 0.86 | 1.2  | 60 | 7.3 | 27 | 0.005 | 4615.21 | 4 |
| 2016/12/15 | 46  | 9.2 | 0.85 | 11  | 0.75 | 0.09 | 0.22 | 68 | 8.8 | 28 | 5.802 | 1251.42 | 3 |
| 2016/12/17 | 81  | 17  | 1.3  | 13  | 1.5  | 0.43 | 0.93 | 62 | 7.5 | 25 | 0.179 | 929.87  | 5 |
| 2016/12/20 | 124 | 29  | 2.0  | 15  | 2.1  | 0.75 | 2.1  | 65 | 5.8 | 29 | 0.003 | 3904.70 | 5 |
| 2016/12/27 | 50  | 13  | 0.92 | 14  | 1.0  | 0.17 | 0.40 | 58 | 5.9 | 29 | 0.000 | 5351.00 | 3 |
| 2017/1/3   | 57  | 12  | 1.3  | 9.8 | 1.1  | 0.20 | 0.54 | 70 | 7.6 | 27 | 0.114 | 2825.05 | 3 |
| 2017/1/7   | 110 | 25  | 2.0  | 12  | 2.3  | 0.59 | 1.3  | 71 | 7.0 | 28 | 2.041 | 330.58  | 4 |
| 2017/1/14  | 90  | 20  | 1.9  | 10  | 1.7  | 0.50 | 0.80 | 75 | 4.7 | 29 | 0.599 | 3377.36 | 5 |
| 2017/1/21  | 66  | 14  | 1.1  | 13  | 1.0  | 0.30 | 0.87 | 62 | 6.1 | 29 | 0.000 | 3822.33 | 3 |
| 2017/1/28  | 98  | 22  | 1.8  | 12  | 1.6  | 0.50 | 1.2  | 55 | 5.1 | 27 | 0.000 | 5900.06 | 4 |

---

109    BDL: below detection limits.

110

111



112 **Table S2.** The concentration of TSP, carbonaceous aerosol, WSON, WSIN, and  
113 molecular markers in marine-, mixed-, and continental-influenced days.

|                                           | Marine (n = 36) |       | Mixed (n = 21) |       | Continental (n = 27) |       | All (n = 84) |       |
|-------------------------------------------|-----------------|-------|----------------|-------|----------------------|-------|--------------|-------|
|                                           | Ave             | SD    | Ave            | SD    | Ave                  | SD    | Ave          | SD    |
| TSP ( $\mu\text{g m}^{-3}$ )              | 42              | 21    | 54             | 24    | 73                   | 34    | 55           | 30    |
| OC ( $\mu\text{g m}^{-3}$ )               | 8.4             | 2.4   | 11             | 4.7   | 17                   | 7.7   | 12           | 6.3   |
| EC ( $\mu\text{g m}^{-3}$ )               | 1.2             | 0.32  | 1.4            | 0.48  | 1.6                  | 0.40  | 1.4          | 0.43  |
| WSOC ( $\mu\text{g m}^{-3}$ )             | 4.6             | 1.8   | 5.2            | 2.5   | 8.5                  | 4.7   | 6.0          | 3.6   |
| WSON ( $\mu\text{gN m}^{-3}$ )            | 0.72            | 0.25  | 1.0            | 0.34  | 1.2                  | 0.43  | 0.95         | 0.40  |
| $\text{NH}_4^+$ ( $\mu\text{gN m}^{-3}$ ) | 0.42            | 0.38  | 0.27           | 0.25  | 0.68                 | 0.56  | 0.47         | 0.44  |
| $\text{NO}_3^-$ ( $\mu\text{gN m}^{-3}$ ) | 0.40            | 0.28  | 0.53           | 0.39  | 0.93                 | 0.68  | 0.60         | 0.52  |
| $\text{Na}^+$ ( $\mu\text{g m}^{-3}$ )    | 1.4             | 0.74  | 0.57           | 0.46  | 0.34                 | 0.28  | 0.86         | 0.74  |
| $\text{Cl}^-$ ( $\mu\text{g m}^{-3}$ )    | 0.27            | 0.16  | 0.20           | 0.14  | 0.21                 | 0.10  | 0.23         | 0.14  |
| *nss- $\text{K}^+$                        | 0.49            | 0.16  | 0.49           | 0.25  | 0.77                 | 0.45  | 0.58         | 0.33  |
| *nss- $\text{SO}_4^{2-}$                  | 5.5             | 2.9   | 2.9            | 2.0   | 4.0                  | 2.6   | 4.0          | 2.6   |
| $\text{Na}^+/\Sigma\text{ions}$           | 0.11            | 0.040 | 0.060          | 0.038 | 0.028                | 0.023 | 0.028        | 0.023 |
| OC/EC                                     | 8.1             | 7.2   | 8.4            | 2.4   | 10.1                 | 3.0   | 8.9          | 5.2   |
| WSOC/OC                                   | 0.54            | 0.11  | 0.44           | 0.08  | 0.49                 | 0.08  | 0.50         | 0.10  |
| WSON/WSOC                                 | 0.17            | 0.070 | 0.22           | 0.070 | 0.17                 | 0.069 | 0.18         | 0.07  |
| Molecular tracers ( $\text{ng m}^{-3}$ )  |                 |       |                |       |                      |       |              |       |
| Levogluconan                              | 70              | 54    | 140            | 112   | 337                  | 282   | 174          | 207   |
| Galactosan                                | 2.3             | 1.4   | 4.9            | 3.6   | 11                   | 8.2   | 5.6          | 6.17  |
| Mannosan                                  | 5.8             | 3.8   | 9.2            | 6.3   | 17                   | 12    | 10.3         | 9.29  |
| Hopanes and steranes                      | 1.2             | 0.4   | 1.3            | 0.7   | 1.3                  | 0.7   | 1.3          | 0.60  |
| 2-MGA                                     | 3.2             | 1.5   | 5.0            | 2.6   | 6.6                  | 4.1   | 4.8          | 3.2   |
| 2-MGL                                     | 36              | 22    | 29             | 17    | 38                   | 23    | 35           | 21    |
| MBTCA                                     | 11              | 7.2   | 31             | 22    | 29                   | 12    | 22           | 17    |
| o-Phthalic acid                           | 7.9             | 4.4   | 4.1            | 3.4   | 7.5                  | 7.3   | 6.8          | 5.5   |
| p-Phthalic acid                           | 10              | 7.9   | 31             | 25    | 43                   | 26    | 26           | 25    |

114 nss-non sea salt

115

**Table S3.** The monthly averaged WSON concentration in the selected coastal cities that are impacted by marine air masses on a globe scale and the corresponding AEC (air mass exposure to Chl-a). The Chl-a concentration was from the MODIS-Aqua (EARTHDATA, <https://giovanni.gsfc.nasa.gov/giovanni/>).

| Sites                 | Data   | Monthly averaged WSON (nmol m <sup>-3</sup> ) | AEC (mg m <sup>-3</sup> ) | References                      |
|-----------------------|--------|-----------------------------------------------|---------------------------|---------------------------------|
| Keelung City          | 200607 | 27.2                                          | 0.136                     | Chen and Chen, (2010)           |
|                       | 200608 | 22.9                                          | 0.190                     |                                 |
| South China Sea       | 200504 | 65                                            | 0.163                     | Shi <i>et al.</i> (2010)        |
| Jiaozhou Bay, China   | 201507 | 190                                           | 0.860                     | Xing <i>et al.</i> (2018)       |
| Hong Kong             | 201108 | 95                                            | 0.524                     | Ho <i>et al.</i> (2019)         |
|                       | 201109 | 95                                            | 0.319                     |                                 |
| Hong Kong             | 201701 | 130.5                                         | 0.391                     | Leung <i>et al.</i> (2024)      |
|                       | 201703 | 114.7                                         | 0.306                     |                                 |
|                       | 201704 | 119.8                                         | 0.151                     |                                 |
|                       | 201705 | 117.0                                         | 0.230                     |                                 |
|                       | 201706 | 82.6                                          | 0.181                     |                                 |
|                       | 201707 | 114.8                                         | 0.250                     |                                 |
|                       | 201708 | 90.6                                          | 0.499                     |                                 |
|                       | 201709 | 93.3                                          | 0.445                     |                                 |
| Eastern Mediterranean | 201101 | 11.6                                          | 0.081                     | Tsagkaraki <i>et al.</i> (2021) |
|                       | 201102 | 11.1                                          | 0.081                     |                                 |
|                       | 201104 | 9.45                                          | 0.118                     |                                 |
|                       | 201105 | 12.3                                          | 0.085                     |                                 |
|                       | 201106 | 22.2                                          | 0.071                     |                                 |
|                       | 201107 | 14.7                                          | 0.028                     |                                 |
|                       | 201108 | 16.4                                          | 0.082                     |                                 |
|                       | 201109 | 13.9                                          | 0.097                     |                                 |
|                       | 201110 | 8.12                                          | 0.073                     |                                 |
|                       | 201111 | 11.7                                          | 0.062                     |                                 |
|                       | 201112 | 9.71                                          | 0.081                     |                                 |
| Okinawa Island        | 201006 | 34.6                                          | 0.068                     | Kunwar and Kawamura, (2014)     |
|                       | 201007 | 2.88                                          | 0.030                     |                                 |
|                       | 201008 | 2.88                                          | 0.035                     |                                 |
|                       | 201009 | 5.77                                          | 0.048                     |                                 |

|                      |        |        |       |                               |
|----------------------|--------|--------|-------|-------------------------------|
|                      | 201010 | 4.32   | 0.141 |                               |
| Barbados             | 200808 | 3.5    | 0.038 | Zamora <i>et al.</i> (2011)   |
| Huaniao island       | 201907 | 231.30 | 0.505 | Tian <i>et al.</i> (2023)     |
|                      | 201908 | 211.56 | 0.474 |                               |
| Sapporo              | 201006 | 6.56   | 0.159 | Pavuluri <i>et al.</i> (2015) |
|                      | 201007 | 4.63   | 0.135 |                               |
|                      | 201008 | 1.54   | 0.125 |                               |
| Bangkok,<br>Thailand | 201601 | 36.96  | 0.197 | This study                    |
|                      | 201602 | 81.96  | 0.377 |                               |
|                      | 201603 | 52.03  | 0.199 |                               |
|                      | 201604 | 46.30  | 0.238 |                               |
|                      | 201605 | 63.93  | 0.311 |                               |
|                      | 201606 | 57.39  | 0.321 |                               |

120

121

122 **Table S4.** The mapping of bootstrap (BS) factors and Fpeak BS factors to base factors  
 123 for seven-factor solutions. (Number of bootstrap runs: 100)

|                                      |          | Factor 1 | Factor 2 | Factor 3 | Factor 4 | Factor 5 | Factor 6 | Factor 7 | Unmapped |
|--------------------------------------|----------|----------|----------|----------|----------|----------|----------|----------|----------|
| BS Mapping                           | Factor 1 | 100      | 0        | 0        | 0        | 0        | 0        | 0        | 0        |
|                                      | Factor 2 | 0        | 91       | 0        | 3        | 2        | 4        | 0        | 0        |
|                                      | Factor 3 | 0        | 1        | 96       | 1        | 0        | 1        | 1        | 0        |
|                                      | Factor 4 | 0        | 1        | 0        | 99       | 0        | 0        | 0        | 0        |
|                                      | Factor 5 | 0        | 0        | 2        | 0        | 98       | 0        | 0        | 0        |
|                                      | Factor 6 | 0        | 0        | 0        | 1        | 0        | 99       | 0        | 0        |
|                                      | Factor 7 | 1        | 0        | 1        | 2        | 1        | 0        | 95       | 0        |
| Fpeak BC Mapping (Fpeak value - 0.5) | Factor 1 | 100      | 0        | 0        | 0        | 0        | 0        | 0        | 0        |
|                                      | Factor 2 | 0        | 92       | 2        | 3        | 1        | 2        | 0        | 0        |
|                                      | Factor 3 | 0        | 0        | 96       | 3        | 1        | 0        | 0        | 0        |
|                                      | Factor 4 | 0        | 0        | 1        | 97       | 2        | 0        | 0        | 0        |
|                                      | Factor 5 | 0        | 0        | 1        | 2        | 96       | 1        | 0        | 0        |
|                                      | Factor 6 | 0        | 0        | 0        | 2        | 0        | 98       | 0        | 0        |
|                                      | Factor 7 | 1        | 1        | 1        | 3        | 0        | 1        | 93       | 0        |

124

125

126

127

128 **Table S5.** Displacement (DISP) diagnostics of seven-factor solutions. Bootstrapping  
 129 with displacement (BS-DISP) diagnostics of seven-factor solutions.

| Constrained DISP Diagnostics:    |              |   |   |   |   |   |   |
|----------------------------------|--------------|---|---|---|---|---|---|
| Error Code:                      | 0            |   |   |   |   |   |   |
| %dQ:                             | -0.016758291 |   |   |   |   |   |   |
| Swaps by Factor:                 | 0            | 0 | 0 | 0 | 0 | 0 | 0 |
| Constrained BS-DISP Diagnostics: |              |   |   |   |   |   |   |
| # of Cases:                      | 81           |   |   |   |   |   |   |
| %dQ:                             | -0.106123702 |   |   |   |   |   |   |
| Swaps by Factor:                 | 0            | 5 | 1 | 2 | 4 | 3 | 3 |

130

131

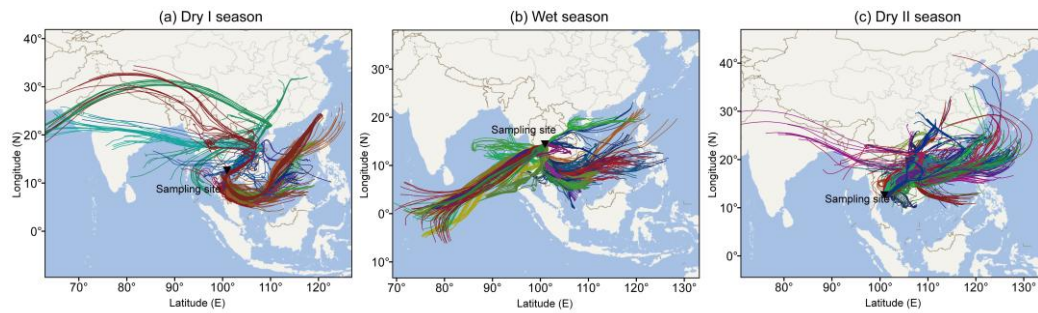

**Figure S1.** The 120 h back air-mass trajectories at Bangkok, from Thailand, in the Dry I (a), Wet (b), and Dry II seasons (c). The air mass trajectories were analyzed using the HYSPLIT model. The map was created using ArcGIS software, while the base map was acquired from the National Platform for Common Geospatial Information Services ([www.webmap.cn](http://www.webmap.cn)).

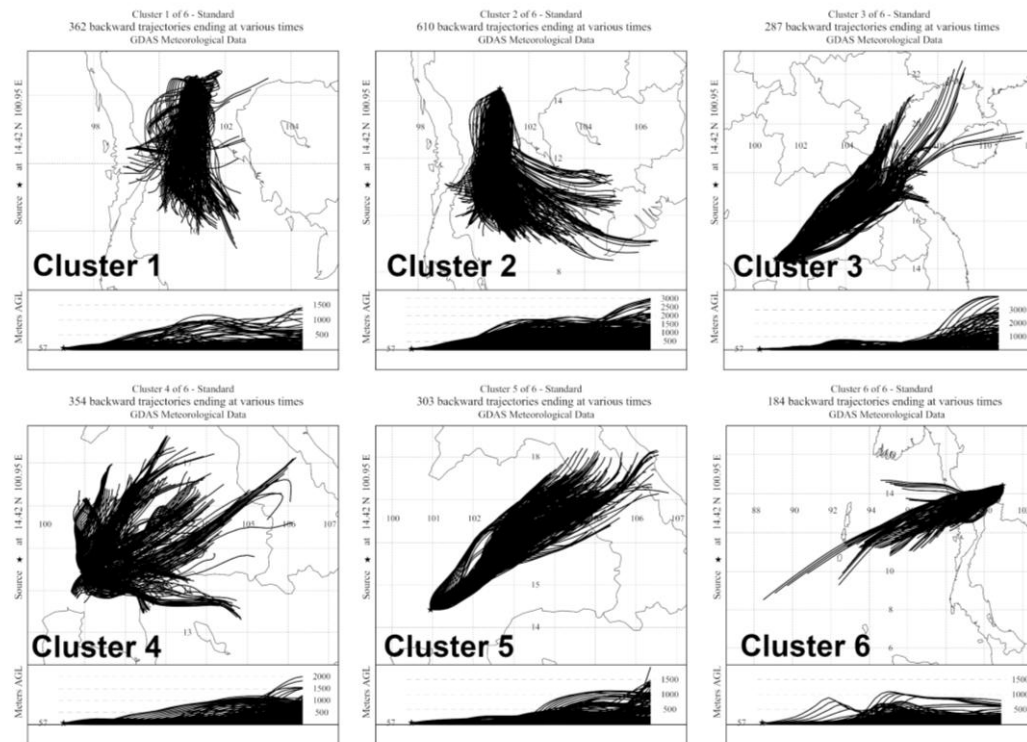

**Figure S2.** The 120 h back air-mass trajectories at Bangkok, from Thailand, during January, 2016 to January, 2017. The backward trajectories were clustered into six groups. The air mass trajectories were analyzed using the HYSPLIT model. According to the air cluster, cluster 1, 2, and 6 classified as marine air masses, and cluster 3, 4, and 5 were classified as continental air masses.

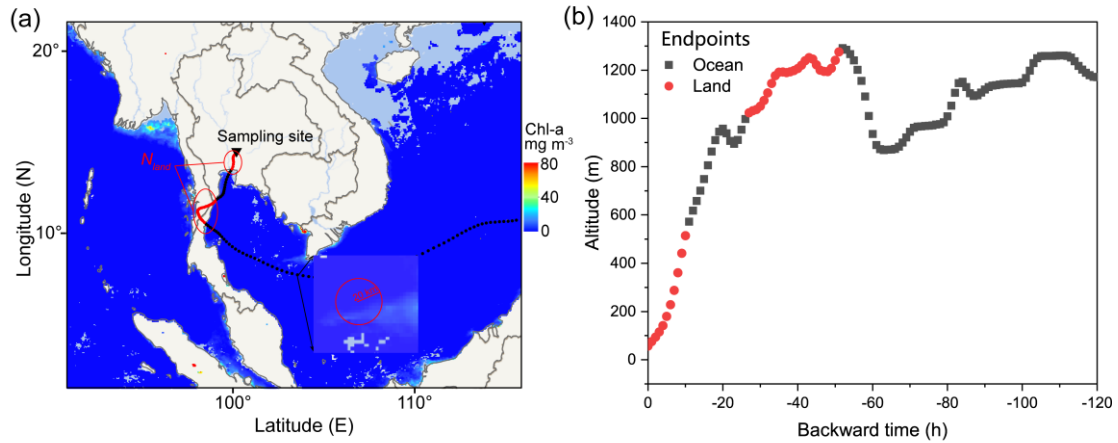

**Figure S3.** Schematic diagram of the calculations of (a)  $R_{\text{land}}$  and AEC, and (b) altitude of each air mass endpoints (b) using 120-hour trajectories. The red points refer to the endpoints along trajectories located over the land. This 20 km radius was representative of the area used as the search radius to compute the mean Chl-a concentration at the air mass endpoints.



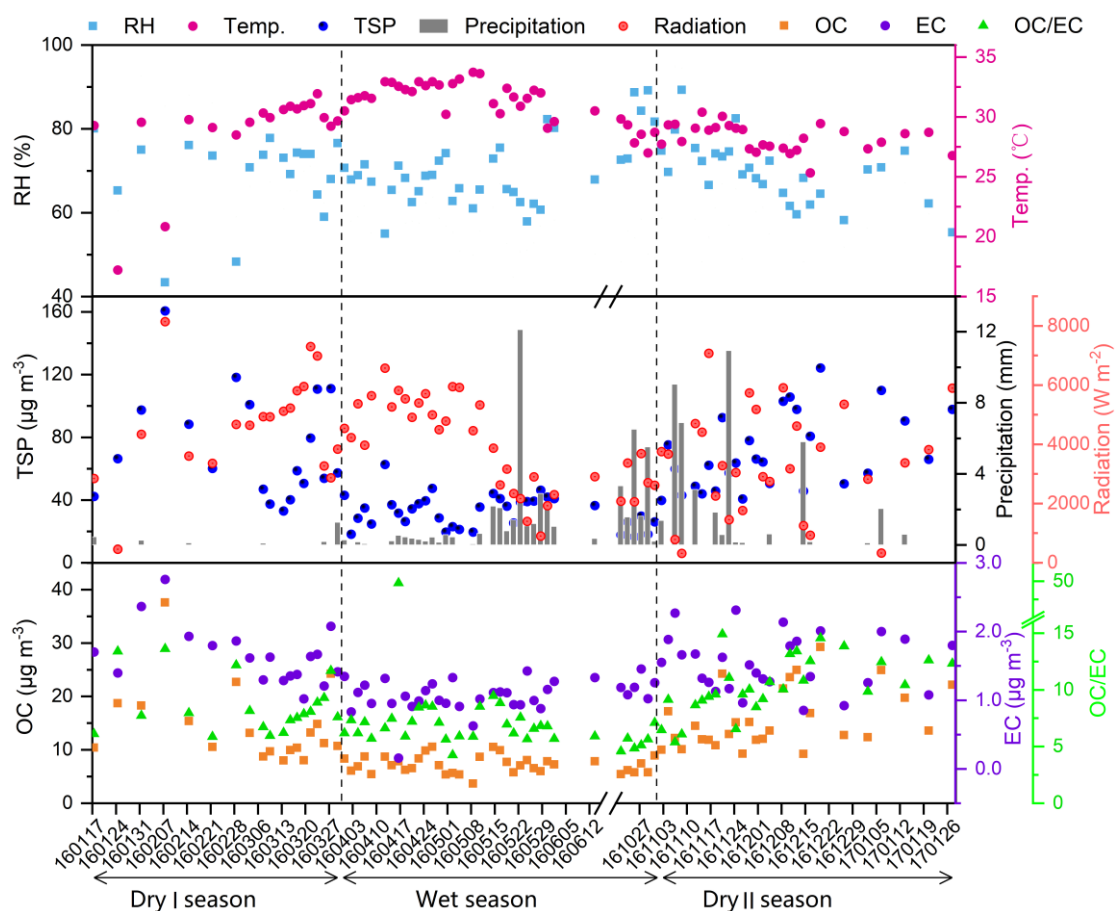

**Figure S4.** Meteorological data including relative humidity (RH), temperature (Temp.), precipitation, and radiation, along with time-series of TSP, OC, EC, and the ratio of OC/EC.

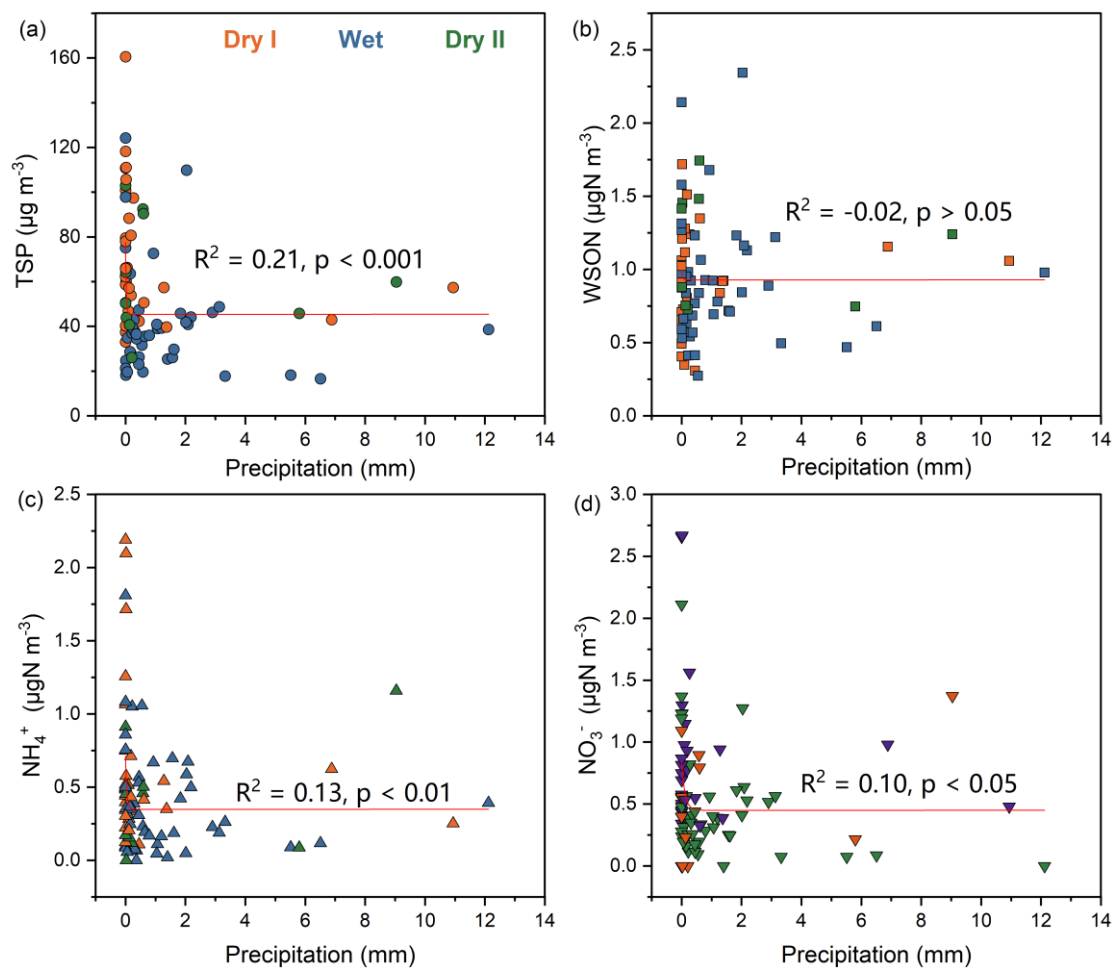

**Figure S5.** Exponential curve between TSP (a), WSON (b), WSIN (c, d) and precipitation.

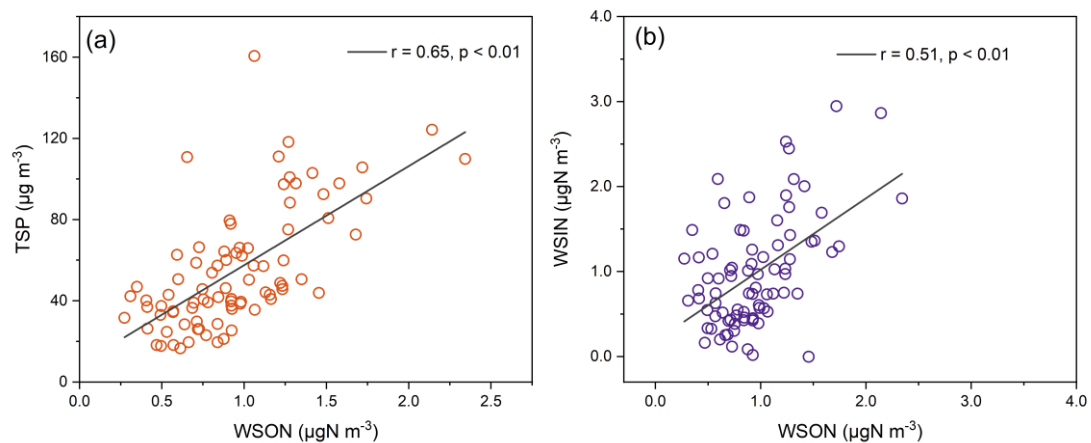

**Figure S6.** Linear relations of WSON to WSIN (sum of  $\text{NO}_3^-$ -N and  $\text{NH}_4^+$ -N).

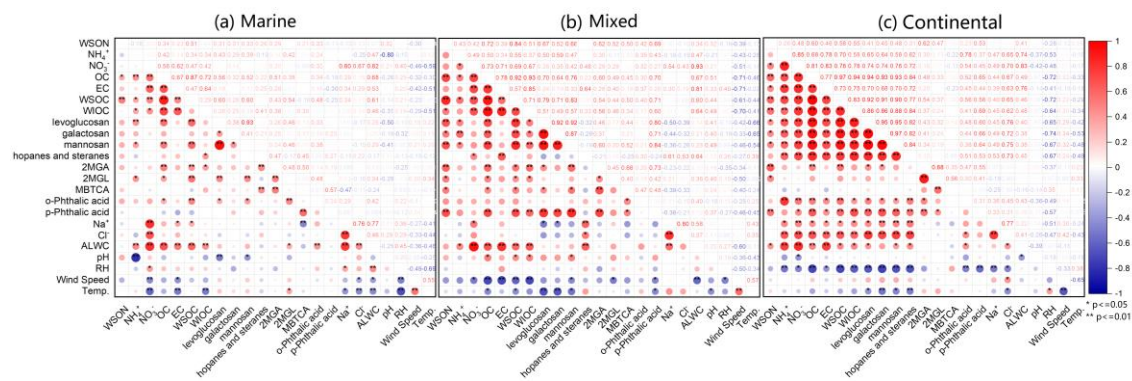

**Figure S7.** The correlation hotpots in marine- (a), mixed- (b), and continental-influenced days (c).

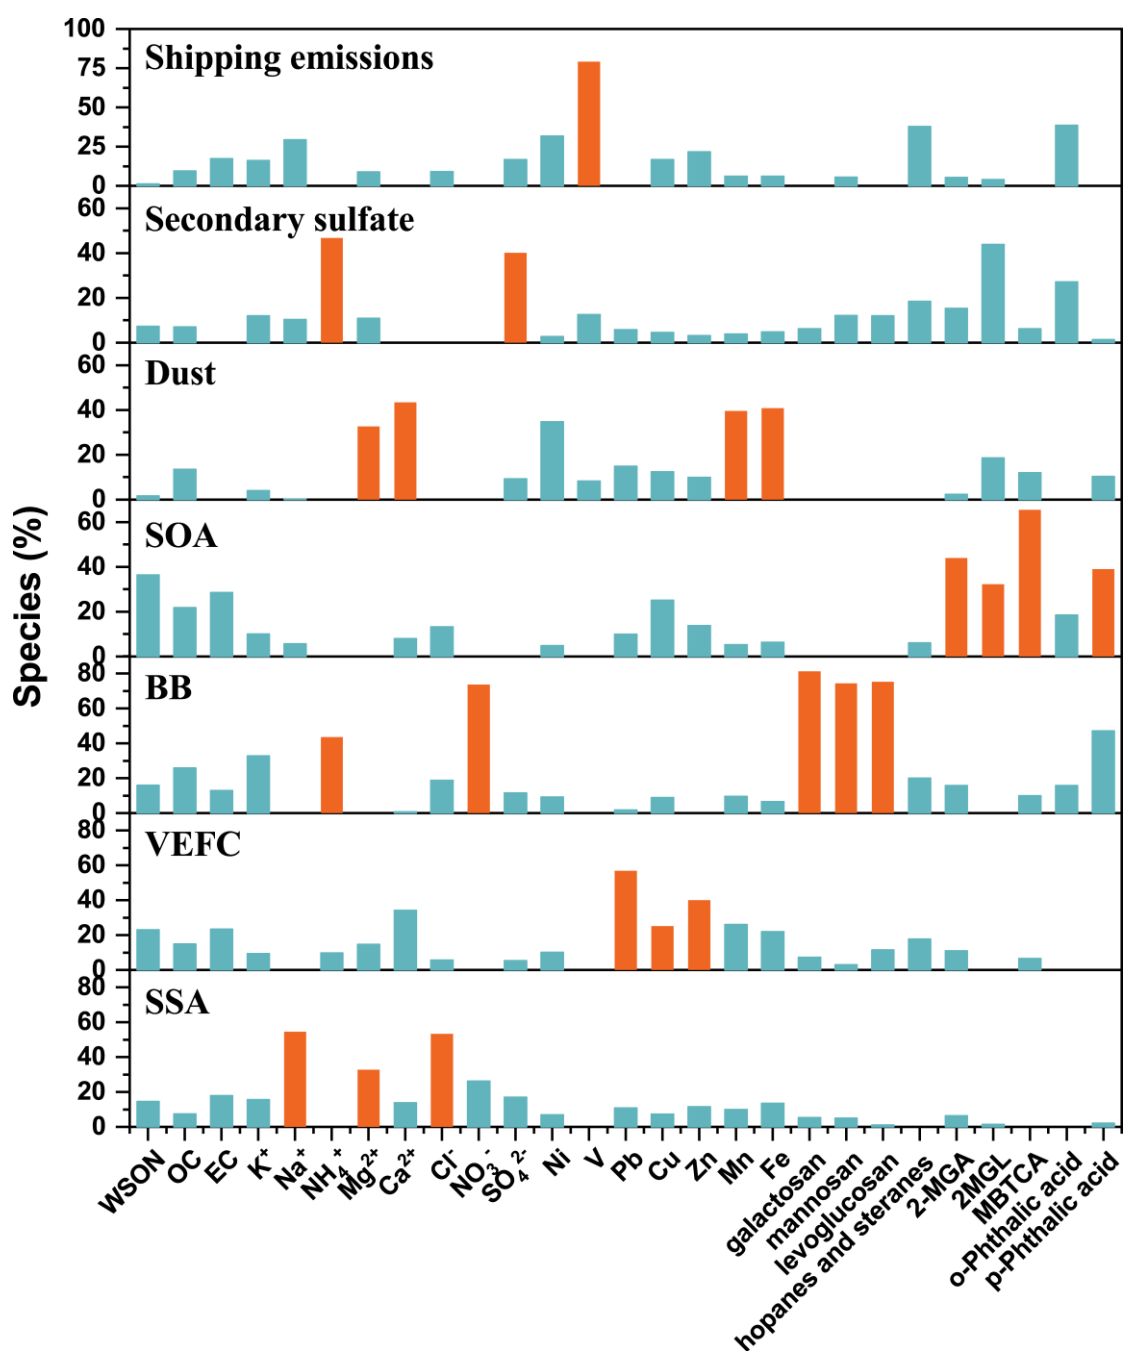

**Figure S8.** Seven factor profiles derived from the PMF solution. The percentage of chemical species in each factor is shown.

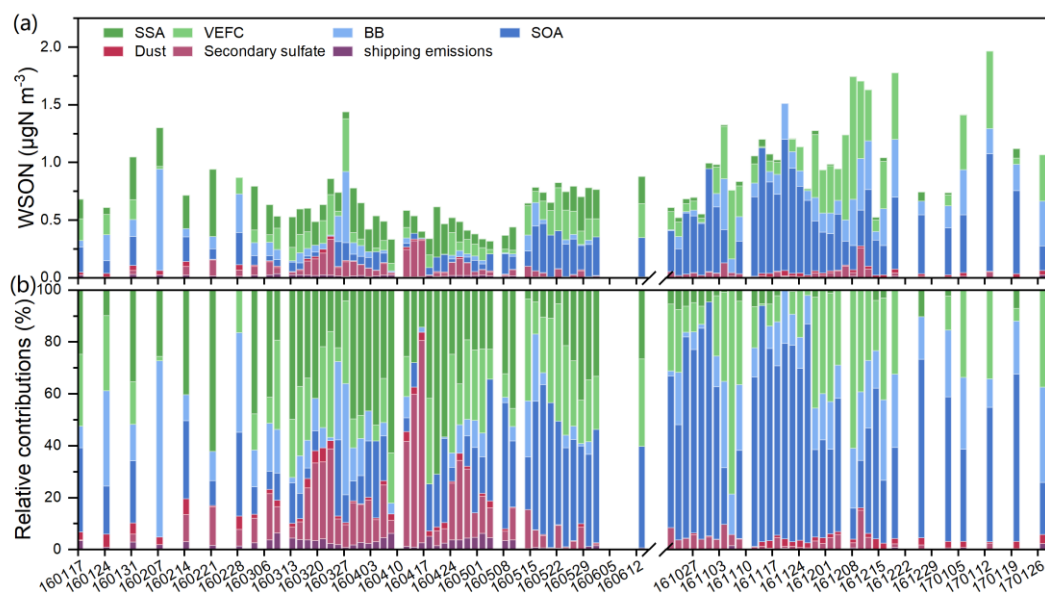

**Figure S9.** The time series of seven PMF source factor and the relative contributions to WSON (a, b).

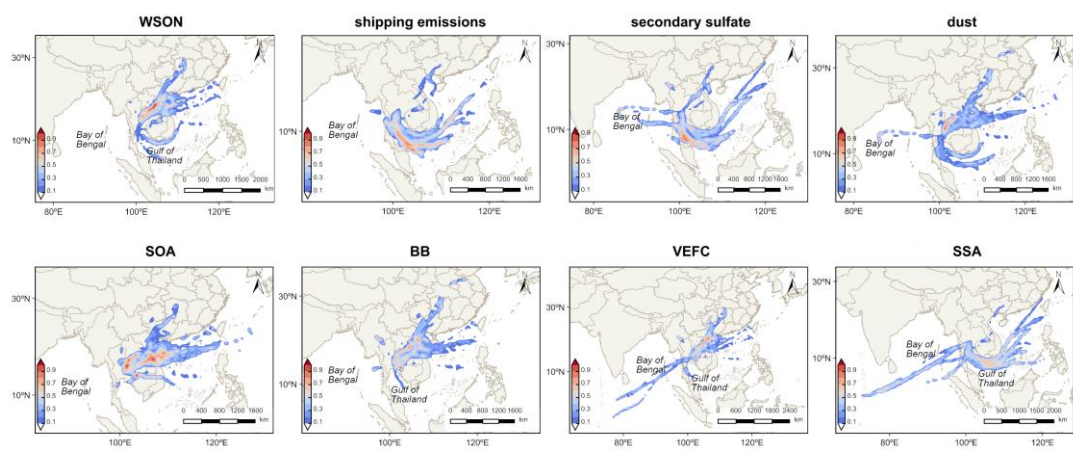

**Figure S10.** PSCF results of WSON and the seven-factor derived WSON resolved by PMF model. Threshold values were set as the 75th percentile of the corresponding values. The 120-hr backward air mass trajectory was analyzed using the HYSPLIT model.

## References:

- Celo, V., E. Dabek-Zlotorzynska, and M. McCurdy (2015), Chemical Characterization of Exhaust Emissions from Selected Canadian Marine Vessels: The Case of Trace Metals and Lanthanoids, *Environ. Sci. Technol.*, 49(8), 5220-5226, <https://doi.org/10.1021/acs.est.5b00127>.
- Chen, H.-Y., and L.-D. Chen (2010), Occurrence of water soluble organic nitrogen in aerosols at a coastal area, *J. Atmos. Chem.*, 65(1), 49-71, <https://doi.org/10.1007/s10874-010-9181-y>.
- Facchini, M. C., et al. (2008), Primary submicron marine aerosol dominated by insoluble organic colloids and aggregates, *Geophys. Res. Lett.*, 35(17), <https://doi.org/10.1029/2008GL034210>.
- Fountoukis, C., and A. Nenes (2007), ISORROPIA II: a computationally efficient thermodynamic equilibrium model for  $K^+$ - $Ca^{2+}$ - $Mg^{2+}$ - $NH_4^+$ - $Na^+$ - $SO_4^{2-}$ - $NO_3^-$ - $Cl^-$ - $H_2O$  aerosols, *Atmos. Chem. Phys.*, 7(17), 4639-4659, <https://doi.org/10.5194/acp-7-4639-2007>.
- Geng, X., Y. Mo, J. Li, G. Zhong, J. Tang, H. Jiang, X. Ding, R. N. Malik, and G. Zhang (2020), Source apportionment of water-soluble brown carbon in aerosols over the northern South China Sea: Influence from land outflow, SOA formation and marine emission, *Atmos. Environ.*, 229, 117484, <https://doi.org/10.1016/j.atmosenv.2020.117484>.
- Ho, S. S. H., L. Li, L. Qu, J. Cao, K. H. Lui, X. Niu, S.-C. Lee, and K. F. Ho (2019), Seasonal behavior of water-soluble organic nitrogen in fine particulate matter (PM<sub>2.5</sub>) at urban coastal environments in Hong Kong, *Air Qual. Atmos. Health*, 12(4), 389-399, <https://doi.org/10.1007/s11869-018-0654-5>.
- Kunwar, B., and K. Kawamura (2014), One-year observations of carbonaceous and nitrogenous components and major ions in the aerosols from subtropical Okinawa Island, an outflow region of Asian dusts, *Atmos. Chem. Phys.*, 14(4), 1819-1836, <https://doi.org/10.5194/acp-14-1819-2014>.
- Leung, C. W., X. Wang, and D. Hu (2024), Characteristics and source apportionment of water-soluble organic nitrogen (WSO<sub>N</sub>) in PM<sub>2.5</sub> in Hong Kong: With focus on amines, urea, and nitroaromatic compounds, *J. Hazard. Mater.*, 469, 133899, <https://doi.org/10.1016/j.jhazmat.2024.133899>.
- Li, X. G., S. X. Wang, L. Duan, J. Hao, C. Li, Y. S. Chen, and L. Yang (2007), Particulate and trace gas emissions from open burning of wheat straw and corn stover in China, *Environ. Sci. Technol.*, 41(17), 6052-6058, <https://doi.org/10.1021/es0705137>.



219 Pavuluri, C. M., K. Kawamura, and P. Q. Fu (2015), Atmospheric chemistry of  
 220 nitrogenous aerosols in northeastern Asia: biological sources and secondary formation,  
 221 *Atmos. Chem. Phys.*, 15(17), 9883-9896, <https://doi.org/10.5194/acp-15-9883-2015>.  
 222 Petit, J. E., O. Favez, A. Albinet, and F. Canonaco (2017), A user-friendly tool for  
 223 comprehensive evaluation of the geographical origins of atmospheric pollution: Wind  
 224 and trajectory analyses, *Environ. Modell. Softw.*, 88, 183-187,  
 225 <https://doi.org/10.1016/j.envsoft.2016.11.022>.  
 226 Shi, J., H. Gao, J. Qi, J. Zhang, and X. Yao (2010), Sources, compositions, and  
 227 distributions of water-soluble organic nitrogen in aerosols over the China Sea, *J.*  
 228 *Geophys. Res.-Atmos.*, 115(D17), <https://doi.org/10.1029/2009JD013238>.  
 229 Tang, J., et al. (2024), Long-Emission-Wavelength Humic-Like Component (L-HULIS)  
 230 as a Secondary Source Tracer of Brown Carbon in the Atmosphere, *J. Geophys. Res.-*  
 231 *Atmos.*, 129(5), e2023JD040144, <https://doi.org/10.1029/2023JD040144>.  
 232 Tian, M., et al. (2023), Seasonal source identification and formation processes of  
 233 marine particulate water soluble organic nitrogen over an offshore island in the East  
 234 China Sea, *Sci. Total Environ.*, 863, 160895,  
 235 <https://doi.org/10.1016/j.scitotenv.2022.160895>.  
 236 Tiwari, S., D. Kaskaoutis, V. K. Soni, S. Dev Attri, and A. K. Singh (2018), Aerosol  
 237 columnar characteristics and their heterogeneous nature over Varanasi, in the central  
 238 Ganges valley, *Environ Sci Pollut Res Int*, 25(25), 24726-24745,  
 239 <https://doi.org/10.1007/s11356-018-2502-4>.  
 240 Tsagkaraki, M., C. Theodosi, G. Grivas, E. Vargiakaki, J. Sciare, C. Savvides, and N.  
 241 Mihalopoulos (2021), Spatiotemporal variability and sources of aerosol water-soluble  
 242 organic nitrogen (WSON), in the Eastern Mediterranean, *Atmos. Environ.*, 246, 118144,  
 243 <https://doi.org/10.1016/j.atmosenv.2020.118144>.  
 244 Viana, M., F. Amato, A. Alastuey, X. Querol, T. Moreno, S. García Dos Santos, M. D.  
 245 Herce, and R. Fernández-Patier (2009), Chemical Tracers of Particulate Emissions  
 246 from Commercial Shipping, *Environ. Sci. Technol.*, 43(19), 7472-7477,  
 247 <https://doi.org/10.1021/es901558t>.  
 248 Xing, J., J. Song, H. Yuan, Q. Wang, X. Li, N. Li, L. Duan, and B. Qu (2018), Water-  
 249 soluble nitrogen and phosphorus in aerosols and dry deposition in Jiaozhou Bay, North  
 250 China: Deposition velocities, origins and biogeochemical implications, *Atmos. Res.*,  
 251 207, 90-99, <https://doi.org/10.1016/j.atmosres.2018.03.001>.  
 252 Xu, B., et al. (2022), Large contribution of fossil-derived components to aqueous  
 253 secondary organic aerosols in China, *Nat. Commun.*, 13(1), 5115,  
 254 <https://doi.org/10.1038/s41467-022-32863-3>.

255 Zamora, L. M., J. M. Prospero, and D. A. Hansell (2011), Organic nitrogen in aerosols  
256 and precipitation at Barbados and Miami: Implications regarding sources, transport and  
257 deposition to the western subtropical North Atlantic, *J. Geophys. Res.-Atmos.*,  
258 116(D20), <https://doi.org/10.1029/2011JD015660>.

259
